1 **RESEARCH LETTER**

2 **Recent changes in COVID-19 Vaccine Hesitancy among Healthcare Workers**

3 **Short title:** Changes in Vaccine Hesitancy in Healthcare Workers

4

5 Emily C. O'Brien, PhD<sup>1,2</sup>; Haolin Xu, MS<sup>1</sup>; Lauren W. Cohen, MA<sup>1</sup>; Elizabeth A. Shenkman,  
6 PhD<sup>3</sup>; Russell L. Rothman, MD, MPP<sup>4</sup>; Christopher B. Forrest, MD, PhD<sup>5</sup>; Adrian F. Hernandez,  
7 MD, MHS<sup>1,6</sup>

8

9 From the <sup>1</sup>Duke Clinical Research Institute, Durham, NC; <sup>2</sup>Department of Population Health  
10 Sciences, Duke University School of Medicine, Durham, NC; <sup>3</sup>Department of Health Outcomes  
11 and Policy, University of Florida College of Medicine, Gainesville, Florida; <sup>4</sup>Center for Health  
12 Services Research, Vanderbilt University Medical Center, Nashville, TN; <sup>5</sup>Applied Clinical  
13 Research Center, Children's Hospital of Philadelphia, Philadelphia, PA; <sup>6</sup>Department of  
14 Medicine, Duke University School of Medicine, Durham, NC

15

16 **Corresponding author:** Emily C. O'Brien, PhD; Department of Population Health Sciences,  
17 Duke University School of Medicine, 215 Morris Street, Suite 210, Durham, NC, 27701; Phone:  
18 919.668.0670; Fax: 919.668.9196; Email: [emily.obrien@duke.edu](mailto:emily.obrien@duke.edu)

19

20 **Word count: 599**

21

22

23

1 **Introduction.** Early COVID-19 vaccine acceptance rates suggest that up to one-third of HCWs  
2 may be vaccine-hesitant. However, it is unclear whether hesitancy among HCWs has improved  
3 with time and if there are temporal changes whether these differ by healthcare worker role.

4 **Methods.** In October 2020, a brief survey was sent to all participants in the Healthcare Worker  
5 Exposure Response and Outcomes (HERO) Registry with a yes/no question regarding  
6 vaccination under emergency use authorization (EUA): “If an FDA emergency use-approved  
7 vaccine to prevent coronavirus/COVID-19 was available right now at no cost, would you agree  
8 to be vaccinated?” The poll was repeated in December 2020, with the same question sent to all  
9 registry participants. Willingness was defined as a “Yes” response, and hesitancy was defined as  
10 a “No” response. Participants were stratified into clinical care roles. Baseline demographics of  
11 survey respondents at each timepoint were compared using appropriate univariate statistics (chi-  
12 squared and t-tests). Analyses were descriptive, with frequencies and percentages reported for  
13 each category.

14 **Results.** Of 4882 HERO active registry participants during September 1 – October 31, 2020,  
15 2070 (42.4%) completed the October survey, and n=1541 (31.6%) completed the December  
16 survey. 70.2% and 67.7% who were in clinical care roles, respectively. In October, 54.2% of  
17 HCWs in clinical roles said they would take an EUA-approved vaccine, which increased to  
18 76.2% in December. The largest gain in vaccine willingness was observed among physicians,  
19 64.0% of whom said they would take a vaccine in October, compared with 90.5% in December.  
20 Nurses were the least likely to report that they would take a vaccine in both October (46.6%) and  
21 December (66.9%). We saw no statistically significant differences in age, race/ethnicity, gender,  
22 or medical role between time points. When restricting to the 998 participants who participated at  
23 both time points, 69% were vaccine-willing at both time points; 15% were hesitant at both time

1 points, 13% who were hesitant in October were willing in December; and 2.9% who were  
2 willing in October were hesitant in December.

3 **Conclusions.** In a set of cross-sectional surveys of vaccine acceptance among healthcare  
4 workers, willingness improved substantially over 2 calendar months during which the US had a  
5 presidential election and two vaccine manufacturers released top-line Phase 3 trial results. While  
6 improved willingness was observed in all role categories, nurses reported the most vaccine  
7 hesitancy at both time points.

8

9

10

11

12

13

14

15

16

17

18

19

20

21

22

1 Vaccine effectiveness at the population level relies on widespread distribution and uptake.<sup>1</sup> Due  
2 to their high risk of exposure to SARS-CoV-2 and essential worker status, the Centers for  
3 Disease Control and Prevention (CDC) recommends that healthcare workers (HCWs) receive the  
4 first available doses of vaccine.<sup>2</sup> Early COVID-19 vaccine acceptance rates suggest that up to  
5 one-third of HCWs may be vaccine-hesitant.<sup>3,4</sup> However, it is unclear whether hesitancy among  
6 HCWs has improved with time and if there are temporal changes whether these differ by  
7 healthcare worker role.

8

## 9 **Methods**

10 The Healthcare Worker Exposure Response and Outcomes (HERO) Registry began in April  
11 2020 to characterize COVID-19 risk factors and outcomes among HCWs in the United States  
12 (ClinicalTrials.gov Identifier NCT04342806). Participants self-enroll in an online portal and  
13 complete periodic electronic surveys. In October 2020, a brief survey was sent to all registry  
14 participants with a yes/no question regarding vaccination under emergency use authorization  
15 (EUA):

16 1) “If an *FDA emergency use-approved* vaccine to prevent coronavirus/COVID-19 was  
17 available right now at no cost, would you agree to be vaccinated?”

18 The poll was repeated in December 2020, with the same question sent to all registry participants.

19 Willingness was defined as a “Yes” response, and hesitancy was defined as a “No” response.

20 Participants were stratified into clinical care roles: registered nurses/licensed practical nurses  
21 (RNs/LPNs); physicians; paramedics/emergency medical technicians (EMTs); physician  
22 assistants/nurse practitioners (PAs/NPs); and, other health diagnosing/treating practitioners.

23 Analyses were descriptive, with frequencies and percentages reported for each category.

1 Baseline demographics of survey respondents at each timepoint were compared using  
2 appropriate univariate statistics (chi-squared and t-tests). Study oversight was provided by the  
3 Duke University Institutional Review Board, and all participants provided informed consent.  
4 Data were analyzed with SAS version 9.4.

## 6 **Results**

7 Of 4882 HERO active registry participants during September 1 – October 31, 2020, 2070  
8 (42.4%) completed the October survey, and n=1541 (31.6%) completed the December survey.  
9 70.2% and 67.7% who were in clinical care roles, respectively. In October, 54.2% of HCWs in  
10 clinical roles said they would take an EUA-approved vaccine, which increased to 76.2% in  
11 December (**Figure 1**). The largest gain in vaccine willingness was observed among physicians,  
12 64.0% of whom said they would take a vaccine in October, compared with 90.5% in December.  
13 Nurses were the least likely to report that they would take a vaccine in both October (46.6%) and  
14 December (66.9%).

15 We saw no statistically significant differences in age, race/ethnicity, gender, or medical  
16 role between time points. When restricting to the 998 participants who participated at both time  
17 points, 69% were vaccine-willing at both time points; 15% were hesitant at both time points,  
18 13% who were hesitant in October were willing in December; and 2.9% who were willing in  
19 October were hesitant in December.

## 21 **Discussion**

22 In a set of cross-sectional surveys of vaccine acceptance among healthcare workers, willingness  
23 improved substantially over 2 calendar months during which the US had a presidential election

1 and two vaccine manufacturers released top-line Phase 3 trial results. While improved  
2 willingness was observed in all role categories, nurses reported the most vaccine hesitancy at  
3 both time points.

4 Vaccine hesitancy is a complex problem with context- and time-specific determinants.<sup>5</sup>  
5 Hesitancy exists along a continuum, with corresponding degrees of susceptibility to change.<sup>6</sup> Our  
6 results suggest that COVID-19 vaccine willingness can change substantially with time and with  
7 changes in external factors such as experience with actual vaccine administration. Despite  
8 temporal improvements, hesitancy remains high among nurses.

9 Given persistently high national COVID-19 infection rates, our study highlights an urgent  
10 need for targeted interventions to increase vaccine acceptance in this critical population  
11 especially since healthcare workers are often the most trusted people in the community.

## **Declarations**

### **Ethics approval and consent to participate**

The Duke Institutional Review Board (IRB) provided ethical oversight for the study. All participants provided informed consent prior to data collection.

### **Competing interests**

Drs. Hernandez, O'Brien, and Forrest reports grants from PCORI, during the conduct of the study. None of these grants relate to the content of this work. Drs. O'Brien and Hernandez report grants from Pfizer to their institution. All other authors report no relevant conflicts.

### **Funding**

The statements presented in this publication are solely the responsibility of the authors and do not necessarily represent the views of other organizations participating in, collaborating with, or funding the Patient-Centered Outcomes Research Institute (PCORI). The study was funded by PCORI through PCORI Award (COVID-19-2020-001), "HERO Registry & Trial: Healthcare Worker Exposure Response and Outcomes."

**Figure 1. Percent of healthcare workers who would take a COVID-19 vaccine by clinical role in October 2020 and December 2020**

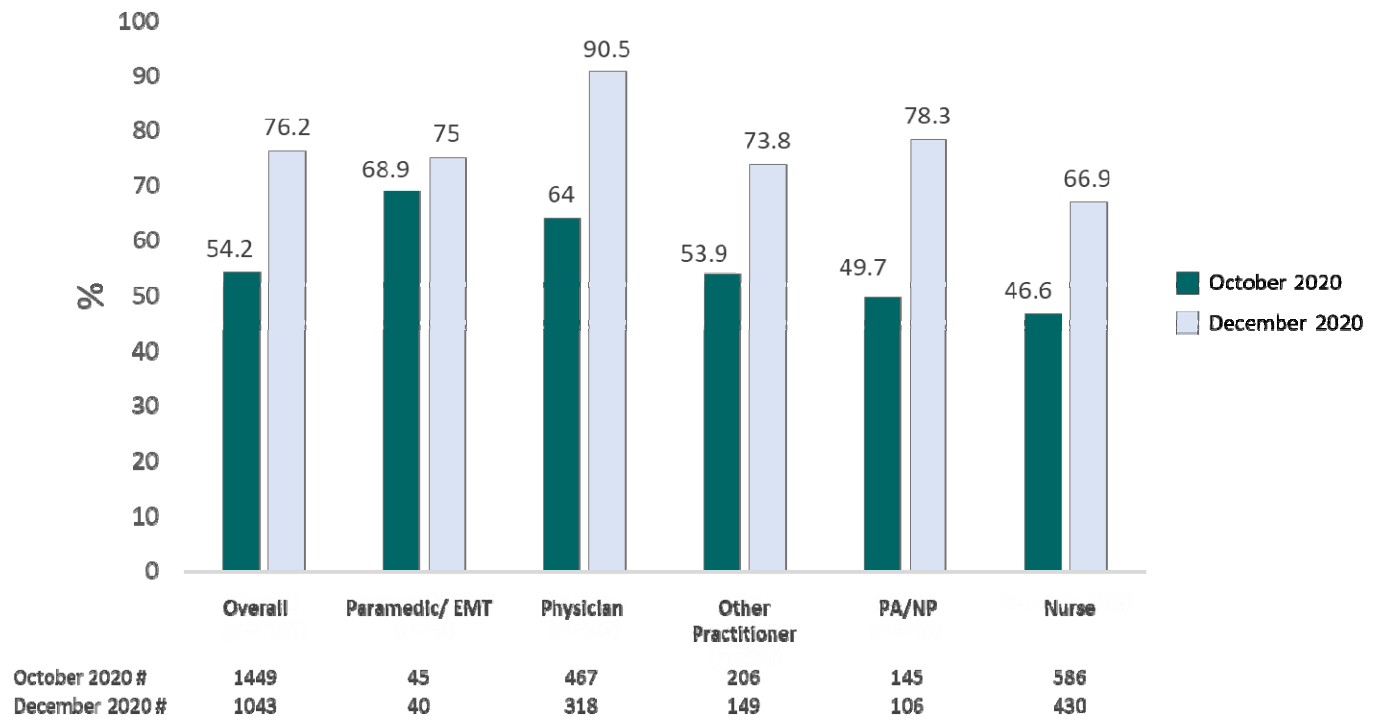



## References

1. Organization WH. Immunization Coverage: Key Facts. . 2020; <https://www.who.int/news-room/fact-sheets/detail/immunization-coverage>.
2. The Centers for Disease Control and Prevention. "COVID-19 Vaccination Program Interim Playbook for Jurisdiction Operations." October 29, 2020. Available: [https://www.cdc.gov/vaccines/imz-managers/downloads/COVID-19-Vaccination-Program-Interim\\_Playbook.pdf](https://www.cdc.gov/vaccines/imz-managers/downloads/COVID-19-Vaccination-Program-Interim_Playbook.pdf).
3. Shaw J, Stewart T, Anderson KB, et al. Assessment of U.S. health care personnel (HCP) attitudes towards COVID-19 vaccination in a large university health care system. *Clin Infect Dis*. 2021.
4. Gharpure R, Guo A, Bishnoi CK, et al. Early COVID-19 First-Dose Vaccination Coverage Among Residents and Staff Members of Skilled Nursing Facilities Participating in the Pharmacy Partnership for Long-Term Care Program — United States, December 2020–January 2021. *MMWR Morb Mortal Wkly Rep* 2021;70:178–182. DOI: <http://dx.doi.org/10.15585/mmwr.mm7005e2>.
5. Organization. WH. *Report of the Sage Working Group on Vaccine Hesitancy*. October 2014. .
6. Butler R. (2017) Vaccine Hesitancy, Acceptance, and Demand. In: Vesikari T., Van Damme P. (eds) *Pediatric Vaccines and Vaccinations*. Springer, Cham. [https://doi.org/10.1007/978-3-319-59952-6\\_4](https://doi.org/10.1007/978-3-319-59952-6_4).
